# Supplementary material
Source: publisher site journal article supplement (https://neobiota.pensoft.net/article/73734/download/suppl/32/)
Supplement: Supplementary file 1

## Sheet: Datasets
												Analyses
Amphipod pair		Infection		Mass		Time in shelter		Aggression		Together in shelter		1				2		3	4		Randomly selected individuals from conspecific pairs of the same infection status
Ind1	Ind2	1	2	1	2	1	2	1	2			A	B	C	D	E	F	G	H		Ind	Species	Infection	Mass ratio	Time in shelter	Aggression
Dh	Dh	Non-inf	Non-inf	0.11	0.11	0	0	2	1	0		r		r		r			i12		1	Dh	Non-inf	1	0	2
Dh	Dh	Non-inf	Non-inf	0.08	0.06	0.0666667	0	3	1	0		r		r		r			i12		1	Dh	Non-inf	1.33333	0.0666667	3
Dh	Dh	Non-inf	Non-inf	0.1	0.1	0	0	2	3	0		r		r		r			i12		2	Dh	Non-inf	1	0	3
Dh	Dh	Non-inf	Non-inf	0.11	0.11	0	0	0	0	0		r		r		r			i12		2	Dh	Non-inf	1	0	0
Dh	Dh	Non-inf	Non-inf	0.12	0.03	0	0	0	0	0		r		r		r			i12		2	Dh	Non-inf	0.25	0	0
Dh	Dh	Non-inf	Non-inf	0.08	0.04	0	1	1	0	0		r		r		r			i12		1	Dh	Non-inf	2	0	1
Dh	Dh	Non-inf	Non-inf	0.05	0.03	0	0.533333	1	0	0		r		r		r			i12		1	Dh	Non-inf	1.66667	0	1
Dh	Dh	Non-inf	Non-inf	0.04	0.02	0	0.85	1	0	0		r		r		r			i12		2	Dh	Non-inf	0.5	0.85	0
Dh	Dh	Non-inf	Non-inf	0.05	0.05	0.9	0	0	0	0		r		r		r			i12		1	Dh	Non-inf	1	0.9	0
Dh	Dh	Non-inf	Non-inf	0.11	0.11	0	0	0	0	0		r		r		r			i12		2	Dh	Non-inf	1	0	0
Dh	Dh	Non-inf	Non-inf	0.09	0.03	0	0	0	0	0		r		r		r			i12		1	Dh	Non-inf	3	0	0
Dh	Dh	Non-inf	Non-inf	0.11	0.11	0	0	0	0	0		r		r		r			i12		1	Dh	Non-inf	1	0	0
Dh	Dh	Non-inf	Non-inf	0.05	0.03	0	0	0	0	0		r		r		r			i12		2	Dh	Non-inf	0.6	0	0
Dh	Dh	Non-inf	Non-inf	0.06	0.04	0	0	2	3	0		r		r		r			i12		1	Dh	Non-inf	1.5	0	2
Dh	Dh	Non-inf	Non-inf	0.05	0.04	0	0	3	2	0		r		r		r			i12		2	Dh	Non-inf	0.8	0	2
Dh	Dh	Non-inf	Non-inf	0.03	0.01	0	0	0	0	0		r		r		r			i12		2	Dh	Non-inf	0.333333	0	0
Dh	Dh	Non-inf	Non-inf	0.06	0.03	0.35	0	0	0	0.195		r		r		r			i12		1	Dh	Non-inf	2	0.35	0
Dh	Dh	Non-inf	Non-inf	0.09	0.02	0	0.95	0	0	0		r		r		r			i12		2	Dh	Non-inf	0.222222	0.95	0
Dh	Dh	Non-inf	Non-inf	0.04	0.04	0	0	0	0	0		r		r		r			i12		2	Dh	Non-inf	1	0	0
Dh	Dh	Non-inf	Non-inf	0.07	0.03	0	0.383333	0	0	0		r		r		r			i12		2	Dh	Non-inf	0.428571	0.383333	0
Dh	Dh	Non-inf	Non-inf	0.05	0.05	0.166667	0	1	1	0		r		r		r			i12		1	Dh	Non-inf	1	0.166667	1
Dh	Dh	Non-inf	Non-inf	0.05	0.02	0.566667	0	0	0	0		r		r		r			i12		1	Dh	Non-inf	2.5	0.566667	0
Dh	Dh	Non-inf	Non-inf	0.02	0.01	0	0	0	0	0		r		r		r			i12		1	Dh	Non-inf	2	0	0
Dh	Dh	Non-inf	Non-inf	0.02	0.02	0	0	2	1	0		r		r		r			i12		2	Dh	Non-inf	1	0	1
Dh	Dh	Non-inf	Non-inf	0.04	0.04	0	0.6	1	3	0		r		r		r			i12		2	Dh	Non-inf	1	0.6	3
Dh	Dh	Non-inf	Non-inf	0.06	0.03	0	0.9	0	0	0		r		r		r			i12		2	Dh	Non-inf	0.5	0.9	0
Dh	Dh	Non-inf	Non-inf	0.07	0.04	0.233333	0	0	0	0		r		r		r			i12		1	Dh	Non-inf	1.75	0.233333	0
Dh	Dh	Non-inf	Non-inf	0.05	0.03	0	0	0	0	0		r		r		r			i12		1	Dh	Non-inf	1.66667	0	0
Dh	Dh	Non-inf	Non-inf	0.05	0.05	0	0	0	0	0.3		r		r		r			i12		2	Dh	Non-inf	1	0	0
Dh	Dh	Non-inf	Non-inf	0.04	0.04	1	0	0	0	0		r		r		r			i12		2	Dh	Non-inf	1	0	0
Dh	Dh	Non-inf	Non-inf	0.04	0.04	0	0.866667	0	0	0		r		r		r			i12		1	Dh	Non-inf	1	0	0
Dh	Dh	Non-inf	Non-inf	0.05	0.03	0	0.116667	0	0	0.265		r		r		r			i12		1	Dh	Non-inf	1.66667	0	0
Dh	Dh	Non-inf	Non-inf	0.06	0.03	0	0	1	0	0		r		r		r			i12		1	Dh	Non-inf	2	0	1
Dh	Dh	Non-inf	Non-inf	0.05	0.05	0	0	0	0	0		r		r		r			i12		2	Dh	Non-inf	1	0	0
Dh	Dh	Non-inf	Non-inf	0.04	0.04	0.766667	0	0	0	0		r		r		r			i12		1	Dh	Non-inf	1	0.766667	0
Dh	Dh	Non-inf	Non-inf	0.04	0.04	0	0	0	0	0		r		r		r			i12		2	Dh	Non-inf	1	0	0
Dh	Dh	Non-inf	Non-inf	0.05	0.05	0	0	0	2	0		r		r		r			i12		2	Dh	Non-inf	1	0	2
Dh	Dh	Non-inf	Non-inf	0.04	0.04	0	0	3	0	0		r		r		r			i12		2	Dh	Non-inf	1	0	0
Dh	Dh	Non-inf	Non-inf	0.04	0.02	0.65	0	0	0	0		r		r		r			i12		1	Dh	Non-inf	2	0.65	0
Dh	Dh	Non-inf	Non-inf	0.05	0.03	0.4	0	0	0	0.18		r		r		r			i12		1	Dh	Non-inf	1.66667	0.4	0
Dh	Dh	Non-inf	Non-inf	0.03	0.03	0	0.9	0	0	0		r		r		r			i12		1	Dh	Non-inf	1	0	0
Dh	Dh	Non-inf	Non-inf	0.04	0.01	0	0	1	0	0		r		r		r			i12		2	Dh	Non-inf	0.25	0	0
Dh	Dh	Non-inf	Non-inf	0.04	0.01	0.966667	0	0	0	0		r		r		r			i12		2	Dh	Non-inf	0.25	0	0
Dh	Dh	Non-inf	Non-inf	0.03	0.01	0	0	0	0	0		r		r		r			i12		2	Dh	Non-inf	0.333333	0	0
Dh	Dh	Non-inf	Inf	0.07	0.05	0.2	0.1	0	2	0		i1	i2	i2	i1	i2			i12
Dh	Dh	Non-inf	Inf	0.05	0.02	0	0	1	0	0		i1	i2	i2	i1	i2			i12
Dh	Dh	Non-inf	Inf	0.07	0.01	0	0.566667	1	0	0		i1	i2	i2	i1	i2			i12
Dh	Dh	Non-inf	Inf	0.06	0.01	0	0	0	0	0		i1	i2	i2	i1	i2			i12
Dh	Dh	Non-inf	Inf	0.04	0.04	0	0	0	1	0		i1	i2	i2	i1	i2			i12
Dh	Dh	Non-inf	Inf	0.02	0.02	1	0	0	0	0		i1	i2	i2	i1	i2			i12
Dh	Dh	Non-inf	Inf	0.04	0.02	0	0.233333	1	0	0.09		i1	i2	i2	i1	i2			i12
Dh	Dh	Non-inf	Inf	0.02	0.02	0.9	0	0	2	0.03		i1	i2	i2	i1	i2			i12
Dh	Dh	Non-inf	Inf	0.1	0.1	0.966667	0	0	2	0.01		i1	i2	i2	i1	i2			i12
Dh	Dh	Non-inf	Inf	0.04	0.06	0.683333	0	0	3	0.04		i1	i2	i2	i1	i2			i12
Dh	Dh	Non-inf	Inf	0.04	0.06	0	0	0	0	0		i1	i2	i2	i1	i2			i12
Dh	Dh	Non-inf	Inf	0.02	0.07	0.783333	0	0	0	0		i1	i2	i2	i1	i2			i12
Dh	Dh	Non-inf	Inf	0.02	0.05	0.283333	0	0	0	0		i1	i2	i2	i1	i2			i12
Dh	Dh	Non-inf	Inf	0.05	0.05	1	0	0	0	0		i1	i2	i2	i1	i2			i12
Dh	Dh	Non-inf	Inf	0.03	0.08	0	0	0	0	0		i1	i2	i2	i1	i2			i12
Dh	Dh	Non-inf	Inf	0.02	0.07	0.616667	0	0	0	0		i1	i2	i2	i1	i2			i12
Dh	Dh	Non-inf	Inf	0.02	0.06	0	0	0	0	0		i1	i2	i2	i1	i2			i12
Dh	Dh	Non-inf	Inf	0.02	0.02	1	0	0	0	0		i1	i2	i2	i1	i2			i12
Dh	Dh	Inf	Inf	0.07	0.07	0	0	1	1	0			r		r				i12		2	Dh	Inf	1	0	1
Dh	Dh	Inf	Inf	0.1	0.1	1	0	0	2	0			r		r				i12		2	Dh	Inf	1	0	2
Dh	Dh	Inf	Inf	0.1	0.05	0	0	0	0	0			r		r				i12		1	Dh	Inf	2	0	0
Dh	Dh	Inf	Inf	0.05	0.03	0	1	0	0	0			r		r				i12		2	Dh	Inf	0.6	1	0
Dh	Dh	Inf	Inf	0.06	0.04	0	0.716667	2	1	0			r		r				i12		1	Dh	Inf	1.5	0	2
Dh	Dh	Inf	Inf	0.1	0.07	0	0.433333	1	1	0			r		r				i12		2	Dh	Inf	0.7	0.433333	1
Dh	Dh	Inf	Inf	0.05	0.03	0	1	2	0	0			r		r				i12		2	Dh	Inf	0.6	1	0
Dh	Dh	Inf	Inf	0.11	0.11	0	0.933333	1	0	0.02			r		r				i12		1	Dh	Inf	1	0	1
Dh	Dh	Inf	Inf	0.03	0.01	0.1	0.266667	2	0	0.15			r		r				i12		1	Dh	Inf	3	0.1	2
Dh	Dh	Inf	Inf	0.04	0.01	0	0	0	0	0			r		r				i12		2	Dh	Inf	0.25	0	0
Dh	Dh	Inf	Inf	0.02	0.02	0.7	0	0	0	0.08			r		r				i12		1	Dh	Inf	1	0.7	0
Dh	Dh	Inf	Inf	0.03	0.03	0	0	1	1	0			r		r				i12		2	Dh	Inf	1	0	1
Dh	Dh	Inf	Inf	0.03	0.02	0	0	0	0	0			r		r				i12		2	Dh	Inf	0.666667	0	0
Dh	Dh	Inf	Inf	0.05	0.04	0	0.9	0	0	0			r		r				i12		1	Dh	Inf	1.25	0	0
Dh	Dh	Inf	Inf	0.07	0.02	0	0	0	0	0			r		r				i12		1	Dh	Inf	3.5	0	0
Dh	Dh	Inf	Inf	0.04	0.03	0.4	0.566667	4	1	0.01			r		r				i12		1	Dh	Inf	1.33333	0.4	4
Dh	Dh	Inf	Inf	0.02	0.02	1	0	0	2	0			r		r				i12		1	Dh	Inf	1	1	0
Dh	Dh	Inf	Inf	0.03	0.03	1	0	0	1	0			r		r				i12		2	Dh	Inf	1	0	1
Dv	Dv	Non-inf	Non-inf	0.1	0.06	0.25	0.15	4	2	0		r		r			r		i12		1	Dv	Non-inf	1.66667	0.25	4
Dv	Dv	Non-inf	Non-inf	0.06	0.06	0.166667	0.266667	5	4	0		r		r			r		i12		2	Dv	Non-inf	1	0.266667	4
Dv	Dv	Non-inf	Non-inf	0.08	0.06	0	0.133333	3	1	0		r		r			r		i12		2	Dv	Non-inf	0.75	0.133333	1
Dv	Dv	Non-inf	Non-inf	0.07	0.04	0.0333333	0.1	4	7	0		r		r			r		i12		2	Dv	Non-inf	0.571429	0.1	7
Dv	Dv	Non-inf	Non-inf	0.16	0.16	0.516667	0.0833333	4	4	0		r		r			r		i12		2	Dv	Non-inf	1	0.0833333	4
Dv	Dv	Non-inf	Non-inf	0.04	0.04	0.383333	0	3	2	0		r		r			r		i12		2	Dv	Non-inf	1	0	2
Dv	Dv	Non-inf	Non-inf	0.12	0.05	0.45	0	5	2	0.12		r		r			r		i12		1	Dv	Non-inf	2.4	0.45	5
Dv	Dv	Non-inf	Non-inf	0.12	0.07	0	0.05	3	2	0		r		r			r		i12		1	Dv	Non-inf	1.71429	0	3
Dv	Dv	Non-inf	Non-inf	0.12	0.08	0.1	0.0333333	4	5	0		r		r			r		i12		1	Dv	Non-inf	1.5	0.1	4
Dv	Dv	Non-inf	Non-inf	0.11	0.07	0.0666667	0	5	5	0		r		r			r		i12		1	Dv	Non-inf	1.57143	0.0666667	5
Dv	Dv	Non-inf	Non-inf	0.03	0.03	0.1	0.166667	5	6	0		r		r			r		i12		2	Dv	Non-inf	1	0.166667	6
Dv	Dv	Non-inf	Non-inf	0.06	0.02	0.133333	0.2	3	4	0		r		r			r		i12		2	Dv	Non-inf	0.333333	0.2	4
Dv	Dv	Non-inf	Non-inf	0.04	0.04	0.0333333	0.166667	4	5	0.085		r		r			r		i12		1	Dv	Non-inf	1	0.0333333	4
Dv	Dv	Non-inf	Non-inf	0.03	0.03	0.133333	0.216667	1	1	0.015		r		r			r		i12		2	Dv	Non-inf	1	0.216667	1
Dv	Dv	Non-inf	Non-inf	0.04	0.04	0.1	0.2	2	3	0		r		r			r		i12		1	Dv	Non-inf	1	0.1	2
Dv	Dv	Non-inf	Non-inf	0.03	0.03	0.133333	0.266667	3	4	0		r		r			r		i12		2	Dv	Non-inf	1	0.266667	4
Dv	Dv	Non-inf	Non-inf	0.13	0.13	0.4	0.133333	4	6	0		r		r			r		i12		2	Dv	Non-inf	1	0.133333	6
Dv	Dv	Non-inf	Non-inf	0.1	0.07	0	0	4	5	0		r		r			r		i12		1	Dv	Non-inf	1.42857	0	4
Dv	Dv	Non-inf	Non-inf	0.13	0.1	0.45	0	6	4	0		r		r			r		i12		1	Dv	Non-inf	1.3	0.45	6
Dv	Dv	Non-inf	Non-inf	0.08	0.08	1	0	0	4	0		r		r			r		i12		2	Dv	Non-inf	1	0	4
Dv	Dv	Non-inf	Non-inf	0.1	0.08	0.2	0.283333	5	5	0		r		r			r		i12		2	Dv	Non-inf	0.8	0.283333	5
Dv	Dv	Non-inf	Non-inf	0.08	0.06	0.216667	0.3	3	4	0.125		r		r			r		i12		1	Dv	Non-inf	1.33333	0.216667	3
Dv	Dv	Non-inf	Non-inf	0.08	0.08	0.283333	0.4	0	0	0		r		r			r		i12		2	Dv	Non-inf	1	0.4	0
Dv	Dv	Non-inf	Non-inf	0.08	0.05	0.0333333	0.166667	4	2	0		r		r			r		i12		1	Dv	Non-inf	1.6	0.0333333	4
Dv	Dv	Non-inf	Non-inf	0.08	0.08	0.116667	0.166667	2	1	0.02		r		r			r		i12		2	Dv	Non-inf	1	0.166667	1
Dv	Dv	Non-inf	Non-inf	0.04	0.02	0.283333	0.166667	0	0	0.015		r		r			r		i12		1	Dv	Non-inf	2	0.283333	0
Dv	Dv	Non-inf	Non-inf	0.1	0.08	0.4	0	2	1	0		r		r			r		i12		2	Dv	Non-inf	0.8	0	1
Dv	Dv	Non-inf	Non-inf	0.06	0.04	1	0	2	0	0		r		r			r		i12		1	Dv	Non-inf	1.5	1	2
Dv	Dv	Non-inf	Non-inf	0.06	0.04	0.133333	0.1	1	0	0.01		r		r			r		i12		1	Dv	Non-inf	1.5	0.133333	1
Dv	Dv	Non-inf	Non-inf	0.08	0.03	0.416667	0	1	0	0.075		r		r			r		i12		2	Dv	Non-inf	0.375	0	0
Dv	Dv	Non-inf	Non-inf	0.09	0.03	0.4	0	4	0	0		r		r			r		i12		2	Dv	Non-inf	0.333333	0	0
Dv	Dv	Non-inf	Non-inf	0.05	0.03	0.533333	0	1	0	0.05		r		r			r		i12		2	Dv	Non-inf	0.6	0	0
Dv	Dv	Non-inf	Non-inf	0.12	0.07	0.2	0.283333	6	2	0		r		r			r		i12		1	Dv	Non-inf	1.71429	0.2	6
Dv	Dv	Non-inf	Non-inf	0.06	0.06	0.316667	0.233333	3	3	0.035		r		r			r		i12		2	Dv	Non-inf	1	0.233333	3
Dv	Dv	Non-inf	Non-inf	0.11	0.07	0.733333	0	2	1	0.03		r		r			r		i12		1	Dv	Non-inf	1.57143	0.733333	2
Dv	Dv	Non-inf	Non-inf	0.07	0.07	0.216667	0.283333	7	4	0		r		r			r		i12		2	Dv	Non-inf	1	0.283333	4
Dv	Dv	Non-inf	Non-inf	0.03	0.03	0	0	5	7	0		r		r			r		i12		2	Dv	Non-inf	1	0	7
Dv	Dv	Non-inf	Non-inf	0.06	0.06	0.466667	0.3	4	2	0		r		r			r		i12		1	Dv	Non-inf	1	0.466667	4
Dv	Dv	Non-inf	Non-inf	0.14	0.05	0.133333	0.266667	7	2	0		r		r			r		i12		2	Dv	Non-inf	0.357143	0.266667	2
Dv	Dv	Non-inf	Non-inf	0.06	0.04	0.216667	0.366667	4	1	0		r		r			r		i12		2	Dv	Non-inf	0.666667	0.366667	1
Dv	Dv	Non-inf	Non-inf	0.05	0.03	0	0	4	0	0		r		r			r		i12		1	Dv	Non-inf	1.66667	0	4
Dv	Dv	Non-inf	Non-inf	0.04	0.04	0.666667	0.0333333	4	6	0		r		r			r		i12		2	Dv	Non-inf	1	0.0333333	6
Dv	Dv	Non-inf	Non-inf	0.1	0.1	0.0333333	0	4	7	0		r		r			r		i12		1	Dv	Non-inf	1	0.0333333	4
Dv	Dv	Non-inf	Non-inf	0.12	0.12	0.366667	0.0333333	3	4	0		r		r			r		i12		1	Dv	Non-inf	1	0.366667	3
Dv	Dv	Non-inf	Non-inf	0.12	0.12	0.0833333	0.383333	2	5	0		r		r			r		i12		1	Dv	Non-inf	1	0.0833333	2
Dv	Dv	Non-inf	Non-inf	0.12	0.09	0.416667	0	4	1	0.06		r		r			r		i12		2	Dv	Non-inf	0.75	0	1
Dv	Dv	Non-inf	Non-inf	0.06	0.06	0.383333	0.433333	3	2	0		r		r			r		i12		2	Dv	Non-inf	1	0.433333	2
Dv	Dv	Non-inf	Non-inf	0.04	0.04	0.233333	0.133333	4	4	0		r		r			r		i12		2	Dv	Non-inf	1	0.133333	4
Dv	Dv	Non-inf	Non-inf	0.03	0.03	0.2	0.1	4	7	0		r		r			r		i12		1	Dv	Non-inf	1	0.2	4
Dv	Dv	Non-inf	Non-inf	0.07	0.04	0.7	0	4	1	0		r		r			r		i12		2	Dv	Non-inf	0.571429	0	1
Dv	Dv	Non-inf	Non-inf	0.03	0.03	0	0.0666667	4	2	0		r		r			r		i12		1	Dv	Non-inf	1	0	4
Dv	Dv	Non-inf	Non-inf	0.12	0.12	0.75	0	4	3	0		r		r			r		i12		2	Dv	Non-inf	1	0	3
Dv	Dv	Non-inf	Non-inf	0.1	0.03	0.0833333	0.15	6	0	0		r		r			r		i12		2	Dv	Non-inf	0.3	0.15	0
Dv	Dv	Non-inf	Non-inf	0.05	0.04	0.2	0.166667	5	3	0		r		r			r		i12		2	Dv	Non-inf	0.8	0.166667	3
Dv	Dv	Non-inf	Non-inf	0.05	0.05	0	0.8	4	1	0		r		r			r		i12		1	Dv	Non-inf	1	0	4
Dv	Dv	Non-inf	Non-inf	0.07	0.07	0.633333	0.25	4	2	0		r		r			r		i12		2	Dv	Non-inf	1	0.25	2
Dv	Dv	Non-inf	Non-inf	0.05	0.02	0.133333	0.2	5	0	0.02		r		r			r		i12		1	Dv	Non-inf	2.5	0.133333	5
Dv	Dv	Non-inf	Non-inf	0.03	0.03	0.283333	0.316667	3	3	0		r		r			r		i12		2	Dv	Non-inf	1	0.316667	3
Dv	Dv	Non-inf	Non-inf	0.08	0.03	0.4	0.333333	6	1	0		r		r			r		i12		1	Dv	Non-inf	2.66667	0.4	6
Dv	Dv	Non-inf	Non-inf	0.1	0.08	0.7	0.1	4	1	0		r		r			r		i12		1	Dv	Non-inf	1.25	0.7	4
Dv	Dv	Non-inf	Non-inf	0.07	0.07	0	0.516667	3	4	0		r		r			r		i12		2	Dv	Non-inf	1	0.516667	4
Dv	Dv	Non-inf	Non-inf	0.12	0.12	0.166667	0.1	5	7	0.05		r		r			r		i12		2	Dv	Non-inf	1	0.1	7
Dv	Dv	Non-inf	Non-inf	0.06	0.04	0.2	0.2	2	0	0		r		r			r		i12		1	Dv	Non-inf	1.5	0.2	2
Dv	Dv	Non-inf	Non-inf	0.04	0.04	0.416667	0.25	3	3	0		r		r			r		i12		2	Dv	Non-inf	1	0.25	3
Dv	Dv	Non-inf	Non-inf	0.06	0.06	0.366667	0	2	4	0.12		r		r			r		i12		2	Dv	Non-inf	1	0	4
Dv	Dv	Non-inf	Non-inf	0.05	0.03	0.266667	0.1	5	2	0.08		r		r			r		i12		2	Dv	Non-inf	0.6	0.1	2
Dv	Dv	Non-inf	Non-inf	0.05	0.02	0.566667	0.2	2	0	0		r		r			r		i12		2	Dv	Non-inf	0.4	0.2	0
Dv	Dv	Non-inf	Non-inf	0.05	0.05	0.233333	0	6	2	0.02		r		r			r		i12		1	Dv	Non-inf	1	0.233333	6
Dv	Dv	Non-inf	Non-inf	0.05	0.05	0	0	4	6	0		r		r			r		i12		2	Dv	Non-inf	1	0	6
Dv	Dv	Non-inf	Non-inf	0.07	0.07	0.666667	0.2	5	5	0		r		r			r		i12		1	Dv	Non-inf	1	0.666667	5
Dv	Dv	Non-inf	Non-inf	0.05	0.05	0.2	0.1	5	4	0		r		r			r		i12		2	Dv	Non-inf	1	0.1	4
Dv	Dv	Non-inf	Non-inf	0.06	0.06	0.133333	0.3	3	6	0		r		r			r		i12		1	Dv	Non-inf	1	0.133333	3
Dv	Dv	Non-inf	Non-inf	0.06	0.06	0.0666667	0.0333333	5	2	0		r		r			r		i12		2	Dv	Non-inf	1	0.0333333	2
Dv	Dv	Non-inf	Inf	0.1	0.08	0.0333333	0.283333	0	2	0.015		i1	i2	i2	i1		i2		i12
Dv	Dv	Non-inf	Inf	0.04	0.04	0.183333	0.283333	1	4	0.03		i1	i2	i2	i1		i2		i12
Dv	Dv	Non-inf	Inf	0.05	0.05	0.316667	0	1	0	0.06		i1	i2	i2	i1		i2		i12
Dv	Dv	Non-inf	Inf	0.07	0.07	0.166667	0.533333	2	2	0		i1	i2	i2	i1		i2		i12
Dv	Dv	Non-inf	Inf	0.11	0.09	0.233333	0.316667	0	3	0		i1	i2	i2	i1		i2		i12
Dv	Dv	Non-inf	Inf	0.09	0.09	0	0.55	0	0	0.08		i1	i2	i2	i1		i2		i12
Dv	Dv	Non-inf	Inf	0.13	0.1	0	0.666667	1	4	0		i1	i2	i2	i1		i2		i12
Dv	Dv	Non-inf	Inf	0.15	0.1	0.05	0.45	0	3	0		i1	i2	i2	i1		i2		i12
Dv	Dv	Non-inf	Inf	0.11	0.08	0.3	0	0	2	0		i1	i2	i2	i1		i2		i12
Dv	Dv	Non-inf	Inf	0.09	0.06	0.366667	0.216667	0	3	0.085		i1	i2	i2	i1		i2		i12
Dv	Dv	Non-inf	Inf	0.1	0.08	0.0666667	0.566667	0	3	0		i1	i2	i2	i1		i2		i12
Dv	Dv	Non-inf	Inf	0.12	0.08	0.133333	0.6	1	2	0.035		i1	i2	i2	i1		i2		i12
Dv	Dv	Non-inf	Inf	0.06	0.04	0.366667	0	0	4	0.07		i1	i2	i2	i1		i2		i12
Dv	Dv	Non-inf	Inf	0.05	0.05	0.733333	0	1	3	0.08		i1	i2	i2	i1		i2		i12
Dv	Dv	Non-inf	Inf	0.11	0.04	0	0.35	0	3	0.09		i1	i2	i2	i1		i2		i12
Dv	Dv	Non-inf	Inf	0.12	0.05	0.316667	0	1	5	0.035		i1	i2	i2	i1		i2		i12
Dv	Dv	Non-inf	Inf	0.04	0.04	0.433333	0	1	6	0		i1	i2	i2	i1		i2		i12
Dv	Dv	Non-inf	Inf	0.09	0.07	0.633333	0	0	4	0.055		i1	i2	i2	i1		i2		i12
Dv	Dv	Non-inf	Inf	0.11	0.11	1	0	0	0	0		i1	i2	i2	i1		i2		i12
Dv	Dv	Non-inf	Inf	0.11	0.08	0.133333	0	1	4	0		i1	i2	i2	i1		i2		i12
Dv	Dv	Non-inf	Inf	0.06	0.04	0.4	0	0	2	0.085		i1	i2	i2	i1		i2		i12
Dv	Dv	Non-inf	Inf	0.04	0.04	0.15	0.366667	0	3	0.035		i1	i2	i2	i1		i2		i12
Dv	Dv	Non-inf	Inf	0.12	0.12	0.266667	0	0	3	0		i1	i2	i2	i1		i2		i12
Dv	Dv	Non-inf	Inf	0.06	0.04	0.133333	0.433333	1	1	0		i1	i2	i2	i1		i2		i12
Dv	Dv	Non-inf	Inf	0.05	0.05	0.216667	0	0	2	0		i1	i2	i2	i1		i2		i12
Dv	Dv	Non-inf	Inf	0.05	0.05	0.8	0.0666667	0	2	0		i1	i2	i2	i1		i2		i12
Dv	Dv	Non-inf	Inf	0.05	0.05	0.533333	0.0666667	0	2	0		i1	i2	i2	i1		i2		i12
Dv	Dv	Non-inf	Inf	0.08	0.08	0.3	0	3	0	0		i1	i2	i2	i1		i2		i12
Dv	Dv	Non-inf	Inf	0.05	0.03	0.1	0.566667	3	1	0		i1	i2	i2	i1		i2		i12
Dv	Dv	Non-inf	Inf	0.05	0.03	0.483333	0.266667	0	3	0.025		i1	i2	i2	i1		i2		i12
Dv	Dv	Non-inf	Inf	0.04	0.03	0.266667	0	0	2	0		i1	i2	i2	i1		i2		i12
Dv	Dv	Non-inf	Inf	0.05	0.03	0.166667	0	0	2	0.08		i1	i2	i2	i1		i2		i12
Dv	Dv	Non-inf	Inf	0.1	0.06	0.533333	0.0666667	3	1	0		i1	i2	i2	i1		i2		i12
Dv	Dv	Non-inf	Inf	0.08	0.03	0.383333	0	3	5	0.01		i1	i2	i2	i1		i2		i12
Dv	Dv	Non-inf	Inf	0.05	0.05	0.233333	0.05	0	3	0.215		i1	i2	i2	i1		i2		i12
Dv	Dv	Non-inf	Inf	0.05	0.03	0.466667	0	1	2	0.065		i1	i2	i2	i1		i2		i12
Dv	Dv	Non-inf	Inf	0.04	0.02	0.233333	0	0	3	0.07		i1	i2	i2	i1		i2		i12
Dv	Dv	Non-inf	Inf	0.08	0.1	0.466667	0.316667	1	5	0.005		i1	i2	i2	i1		i2		i12
Dv	Dv	Non-inf	Inf	0.06	0.06	0.0666667	0.133333	0	4	0.125		i1	i2	i2	i1		i2		i12
Dv	Dv	Non-inf	Inf	0.04	0.04	0	0.25	0	4	0.105		i1	i2	i2	i1		i2		i12
Dv	Dv	Non-inf	Inf	0.1	0.1	0.283333	0.15	1	6	0.08		i1	i2	i2	i1		i2		i12
Dv	Dv	Non-inf	Inf	0.02	0.04	0.5	0.0166667	2	7	0.075		i1	i2	i2	i1		i2		i12
Dv	Dv	Non-inf	Inf	0.05	0.07	0	0.383333	2	4	0.145		i1	i2	i2	i1		i2		i12
Dv	Dv	Non-inf	Inf	0.05	0.05	0.15	0.35	0	4	0.04		i1	i2	i2	i1		i2		i12
Dv	Dv	Non-inf	Inf	0.06	0.06	0.116667	0.583333	1	6	0.01		i1	i2	i2	i1		i2		i12
Dv	Dv	Non-inf	Inf	0.12	0.16	0	0.466667	0	4	0.1		i1	i2	i2	i1		i2		i12
Dv	Dv	Non-inf	Inf	0.03	0.05	0.0333333	0.4	4	2	0		i1	i2	i2	i1		i2		i12
Dv	Dv	Non-inf	Inf	0.07	0.12	0.0166667	0.55	0	5	0.085		i1	i2	i2	i1		i2		i12
Dv	Dv	Non-inf	Inf	0.1	0.1	0.1	0.516667	1	4	0.04		i1	i2	i2	i1		i2		i12
Dv	Dv	Non-inf	Inf	0.03	0.05	0.8	0.0333333	1	4	0		i1	i2	i2	i1		i2		i12
Dv	Dv	Non-inf	Inf	0.04	0.06	0.566667	0.1	0	3	0.01		i1	i2	i2	i1		i2		i12
Dv	Dv	Non-inf	Inf	0.04	0.04	0.0666667	0.55	0	3	0		i1	i2	i2	i1		i2		i12
Dv	Dv	Non-inf	Inf	0.07	0.1	0	0.55	0	0	0.055		i1	i2	i2	i1		i2		i12
Dv	Dv	Non-inf	Inf	0.03	0.03	0	0.416667	1	4	0.1		i1	i2	i2	i1		i2		i12
Dv	Dv	Non-inf	Inf	0.05	0.12	0.4	0	1	5	0.06		i1	i2	i2	i1		i2		i12
Dv	Dv	Non-inf	Inf	0.06	0.06	0.4	0.0666667	1	3	0		i1	i2	i2	i1		i2		i12
Dv	Dv	Non-inf	Inf	0.02	0.06	0.6	0.0333333	0	2	0.03		i1	i2	i2	i1		i2		i12
Dv	Dv	Non-inf	Inf	0.06	0.1	0.733333	0.1	0	2	0		i1	i2	i2	i1		i2		i12
Dv	Dv	Non-inf	Inf	0.06	0.1	1	0	0	5	0		i1	i2	i2	i1		i2		i12
Dv	Dv	Non-inf	Inf	0.04	0.04	0.666667	0.233333	0	3	0		i1	i2	i2	i1		i2		i12
Dv	Dv	Non-inf	Inf	0.04	0.06	0.133333	0.333333	0	3	0		i1	i2	i2	i1		i2		i12
Dv	Dv	Non-inf	Inf	0.04	0.07	0.35	0.25	0	4	0		i1	i2	i2	i1		i2		i12
Dv	Dv	Non-inf	Inf	0.09	0.11	0.1	0.333333	0	4	0		i1	i2	i2	i1		i2		i12
Dv	Dv	Non-inf	Inf	0.05	0.05	0.266667	0.4	1	4	0.04		i1	i2	i2	i1		i2		i12
Dv	Dv	Non-inf	Inf	0.04	0.09	0.0833333	0	0	1	0.275		i1	i2	i2	i1		i2		i12
Dv	Dv	Non-inf	Inf	0.04	0.06	0	0	6	0	0		i1	i2	i2	i1		i2		i12
Dv	Dv	Non-inf	Inf	0.05	0.07	0.95	0	0	4	0		i1	i2	i2	i1		i2		i12
Dv	Dv	Non-inf	Inf	0.04	0.04	0.6	0.1	0	3	0		i1	i2	i2	i1		i2		i12
Dv	Dv	Non-inf	Inf	0.04	0.09	0.4	0.0666667	0	6	0		i1	i2	i2	i1		i2		i12
Dv	Dv	Non-inf	Inf	0.04	0.04	0.616667	0.0666667	0	2	0		i1	i2	i2	i1		i2		i12
Dv	Dv	Non-inf	Inf	0.07	0.07	0.0166667	0	0	4	0.245		i1	i2	i2	i1		i2		i12
Dv	Dv	Non-inf	Inf	0.03	0.05	0.366667	0	0	3	0.04		i1	i2	i2	i1		i2		i12
Dv	Dv	Non-inf	Inf	0.04	0.07	0.6	0.133333	1	5	0.03		i1	i2	i2	i1		i2		i12
Dv	Dv	Non-inf	Inf	0.04	0.04	0.533333	0.0333333	0	3	0.04		i1	i2	i2	i1		i2		i12
Dv	Dv	Non-inf	Inf	0.06	0.09	0.333333	0.166667	0	4	0		i1	i2	i2	i1		i2		i12
Dv	Dv	Non-inf	Inf	0.07	0.07	0.7	0.0333333	0	4	0		i1	i2	i2	i1		i2		i12
Dv	Dv	Non-inf	Inf	0.03	0.03	0.516667	0.3	0	2	0		i1	i2	i2	i1		i2		i12
Dv	Dv	Non-inf	Inf	0.05	0.05	0.466667	0.0666667	1	3	0		i1	i2	i2	i1		i2		i12
Dv	Dv	Non-inf	Inf	0.04	0.06	0.533333	0.0666667	1	4	0.01		i1	i2	i2	i1		i2		i12
Dv	Dv	Non-inf	Inf	0.05	0.05	0.566667	0.3	1	3	0		i1	i2	i2	i1		i2		i12
Dv	Dv	Inf	Inf	0.05	0.02	0	0.683333	6	3	0.005			r		r				i12		2	Dv	Inf	0.4	0.683333	3
Dv	Dv	Inf	Inf	0.08	0.06	0.1	0.0666667	5	3	0.17			r		r				i12		1	Dv	Inf	1.33333	0.1	5
Dv	Dv	Inf	Inf	0.07	0.05	0.0166667	0.716667	6	2	0			r		r				i12		1	Dv	Inf	1.4	0.0166667	6
Dv	Dv	Inf	Inf	0.06	0.04	0	1	0	0	0			r		r				i12		1	Dv	Inf	1.5	0	0
Dv	Dv	Inf	Inf	0.06	0.03	0	0.733333	2	9	0			r		r				i12		1	Dv	Inf	2	0	2
Dv	Dv	Inf	Inf	0.08	0.05	0.183333	0.25	4	3	0.045			r		r				i12		1	Dv	Inf	1.6	0.183333	4
Dv	Dv	Inf	Inf	0.06	0.06	0.433333	0	4	3	0.015			r		r				i12		2	Dv	Inf	1	0	3
Dv	Dv	Inf	Inf	0.1	0.08	0	0.316667	2	1	0.015			r		r				i12		1	Dv	Inf	1.25	0	2
Dv	Dv	Inf	Inf	0.12	0.12	0.416667	0	2	2	0.075			r		r				i12		1	Dv	Inf	1	0.416667	2
Dv	Dv	Inf	Inf	0.15	0.12	0.133333	0	6	2	0			r		r				i12		1	Dv	Inf	1.25	0.133333	6
Dv	Dv	Inf	Inf	0.12	0.07	0.0666667	0.233333	4	3	0.02			r		r				i12		1	Dv	Inf	1.71429	0.0666667	4
Dv	Dv	Inf	Inf	0.06	0.04	0.0333333	0	0	3	0.06			r		r				i12		1	Dv	Inf	1.5	0.0333333	0
Dv	Dv	Inf	Inf	0.07	0.05	0	0.783333	0	0	0.065			r		r				i12		2	Dv	Inf	0.714286	0.783333	0
Dv	Dv	Inf	Inf	0.12	0.06	0	0.433333	1	1	0			r		r				i12		1	Dv	Inf	2	0	1
Dv	Dv	Inf	Inf	0.12	0.12	0.516667	0.0833333	1	1	0			r		r				i12		2	Dv	Inf	1	0.0833333	1
Dv	Dv	Inf	Inf	0.06	0.03	0	0	0	0	0.3			r		r				i12		1	Dv	Inf	2	0	0
Dv	Dv	Inf	Inf	0.03	0.03	0	0.0666667	2	2	0.24			r		r				i12		1	Dv	Inf	1	0	2
Dv	Dv	Inf	Inf	0.13	0.13	0.516667	0.183333	6	4	0.09			r		r				i12		2	Dv	Inf	1	0.183333	4
Dv	Dv	Inf	Inf	0.1	0.1	0.2	0.45	2	1	0			r		r				i12		1	Dv	Inf	1	0.2	2
Dv	Dv	Inf	Inf	0.08	0.03	0.733333	0	4	0	0.08			r		r				i12		2	Dv	Inf	0.375	0	0
Dv	Dv	Inf	Inf	0.09	0.06	0.133333	0.7	3	0	0			r		r				i12		1	Dv	Inf	1.5	0.133333	3
Dv	Dv	Inf	Inf	0.05	0.03	0.733333	0	6	2	0.01			r		r				i12		2	Dv	Inf	0.6	0	2
Dv	Dv	Inf	Inf	0.05	0.03	0.533333	0	3	1	0.09			r		r				i12		1	Dv	Inf	1.66667	0.533333	3
Dv	Dv	Inf	Inf	0.12	0.08	0.183333	0	2	3	0			r		r				i12		2	Dv	Inf	0.666667	0	3
Dv	Dv	Inf	Inf	0.05	0.04	0.3	0	3	2	0.18			r		r				i12		2	Dv	Inf	0.8	0	2
Dv	Dv	Inf	Inf	0.04	0.04	0.283333	0	2	0	0.09			r		r				i12		2	Dv	Inf	1	0	0
Dv	Dv	Inf	Inf	0.04	0.03	0.416667	0	2	5	0.11			r		r				i12		1	Dv	Inf	1.33333	0.416667	2
Dv	Dv	Inf	Inf	0.04	0.04	0	0.466667	3	1	0			r		r				i12		2	Dv	Inf	1	0.466667	1
Dv	Dv	Inf	Inf	0.03	0.03	0.166667	0.4	3	5	0.035			r		r				i12		1	Dv	Inf	1	0.166667	3
Dv	Dv	Inf	Inf	0.05	0.05	0.266667	0.4	5	4	0.045			r		r				i12		2	Dv	Inf	1	0.4	4
Dv	Dv	Inf	Inf	0.14	0.09	0.3	0.116667	4	4	0			r		r				i12		1	Dv	Inf	1.55556	0.3	4
Dv	Dv	Inf	Inf	0.09	0.07	0.183333	0	0	1	0.245			r		r				i12		2	Dv	Inf	0.777778	0	1
Dv	Dv	Inf	Inf	0.07	0.05	0.3	0.55	5	3	0			r		r				i12		2	Dv	Inf	0.714286	0.55	3
Dv	Dv	Inf	Inf	0.05	0.03	0.366667	0.3	4	2	0.02			r		r				i12		1	Dv	Inf	1.66667	0.366667	4
Dv	Dv	Inf	Inf	0.05	0.05	0.533333	0.166667	5	3	0.04			r		r				i12		2	Dv	Inf	1	0.166667	3
Dv	Dv	Inf	Inf	0.04	0.04	0.316667	0.4	3	5	0.02			r		r				i12		1	Dv	Inf	1	0.316667	3
Dv	Dv	Inf	Inf	0.08	0.03	0.466667	0.366667	5	2	0.05			r		r				i12		2	Dv	Inf	0.375	0.366667	2
Dv	Dv	Inf	Inf	0.03	0.02	0.133333	0.166667	3	1	0.14			r		r				i12		2	Dv	Inf	0.666667	0.166667	1
Dv	Dv	Inf	Inf	0.05	0.03	0.216667	0.383333	4	1	0.06			r		r				i12		1	Dv	Inf	1.66667	0.216667	4
Dv	Dv	Inf	Inf	0.05	0.05	0	0	0	0	0.3			r		r				i12		2	Dv	Inf	1	0	0
Dv	Dv	Inf	Inf	0.06	0.02	0.316667	0	1	4	0.04			r		r				i12		1	Dv	Inf	3	0.316667	1
Dv	Dv	Inf	Inf	0.05	0.05	0.366667	0.0333333	2	2	0.09			r		r				i12		1	Dv	Inf	1	0.366667	2
Dv	Dv	Inf	Inf	0.09	0.07	1	0	0	0	0			r		r				i12		1	Dv	Inf	1.28571	1	0
Dv	Dv	Inf	Inf	0.07	0.05	0.416667	0	0	2	0.175			r		r				i12		2	Dv	Inf	0.714286	0	2
Dv	Dv	Inf	Inf	0.07	0.04	0.0666667	0	0	2	0.235			r		r				i12		2	Dv	Inf	0.571429	0	2
Dv	Dv	Inf	Inf	0.05	0.03	0.55	0.133333	4	3	0			r		r				i12		2	Dv	Inf	0.6	0.133333	3
Dv	Dv	Inf	Inf	0.06	0.04	0.7	0	0	4	0.06			r		r				i12		1	Dv	Inf	1.5	0.7	0
Dv	Dv	Inf	Inf	0.05	0.05	0.366667	0.0666667	0	3	0.1			r		r				i12		1	Dv	Inf	1	0.366667	0
Dv	Dv	Inf	Inf	0.05	0.05	0	0.266667	2	0	0			r		r				i12		1	Dv	Inf	1	0	2
Dv	Dv	Inf	Inf	0.04	0.04	0.5	0.1	1	4	0.055			r		r				i12		2	Dv	Inf	1	0.1	4
Dv	Dv	Inf	Inf	0.06	0.04	0.133333	0.2	1	2	0.04			r		r				i12		1	Dv	Inf	1.5	0.133333	1
Dv	Dv	Inf	Inf	0.05	0.03	0.666667	0.0333333	1	2	0.055			r		r				i12		2	Dv	Inf	0.6	0.0333333	2
Dv	Dv	Inf	Inf	0.07	0.04	0.483333	0	1	4	0.11			r		r				i12		2	Dv	Inf	0.571429	0	4
Dv	Dv	Inf	Inf	0.04	0.04	0.383333	0.266667	2	4	0.035			r		r				i12		1	Dv	Inf	1	0.383333	2
Dv	Dv	Inf	Inf	0.05	0.05	0	1	4	0	0			r		r				i12		2	Dv	Inf	1	1	0
Dv	Dv	Inf	Inf	0.03	0.03	0	0.0666667	5	3	0			r		r				i12		2	Dv	Inf	1	0.0666667	3
Dv	Dv	Inf	Inf	0.09	0.06	0.5	0.183333	6	2	0.035			r		r				i12		2	Dv	Inf	0.666667	0.183333	2
Dv	Dv	Inf	Inf	0.14	0.09	0.233333	0.4	6	2	0			r		r				i12		2	Dv	Inf	0.642857	0.4	2
Dv	Dv	Inf	Inf	0.1	0.07	0.166667	0.4	4	1	0.035			r		r				i12		1	Dv	Inf	1.42857	0.166667	4
Dv	Dv	Inf	Inf	0.05	0.02	0.633333	0	4	0	0			r		r				i12		2	Dv	Inf	0.4	0	0
Dv	Dv	Inf	Inf	0.05	0.05	0.166667	0.266667	3	1	0.01			r		r				i12		2	Dv	Inf	1	0.266667	1
Dv	Dv	Inf	Inf	0.05	0.05	0.133333	0.8	4	1	0			r		r				i12		1	Dv	Inf	1	0.133333	4
Dv	Dv	Inf	Inf	0.14	0.06	0.1	0.0333333	6	0	0.04			r		r				i12		2	Dv	Inf	0.428571	0.0333333	0
Dv	Dv	Inf	Inf	0.05	0.05	0.433333	0.366667	3	3	0			r		r				i12		2	Dv	Inf	1	0.366667	3
Dv	Dv	Inf	Inf	0.05	0.05	0.733333	0.0666667	1	5	0			r		r				i12		1	Dv	Inf	1	0.733333	1
Dv	Dv	Inf	Inf	0.05	0.05	0.633333	0.1	1	3	0.08			r		r				i12		1	Dv	Inf	1	0.633333	1
Dh	Dv	Non-inf	Non-inf	0.05	0.08	0.966667	0	0	0	0						i1	i2	i12	i12
Dh	Dv	Non-inf	Non-inf	0.07	0.1	0.641711	0.0166667	4	1	0						i1	i2	i12	i12
Dh	Dv	Non-inf	Non-inf	0.01	0.06	0	0.9	0	0	0						i1	i2	i12	i12
Dh	Dv	Non-inf	Non-inf	0.04	0.09	1	0	0	0	0						i1	i2	i12	i12
Dh	Dv	Non-inf	Non-inf	0.03	0.05	0	0.833333	0	1	0.0566038						i1	i2	i12	i12
Dh	Dv	Non-inf	Non-inf	0.01	0.03	0	0	0	3	0						i1	i2	i12	i12
Dh	Dv	Non-inf	Non-inf	0.03	0.05	0.833333	0	0	2	0.0566038						i1	i2	i12	i12
Dh	Dv	Non-inf	Non-inf	0.04	0.06	0	0	0	0	0						i1	i2	i12	i12
Dh	Dv	Non-inf	Non-inf	0.03	0.05	0	0	0	0	0						i1	i2	i12	i12
Dh	Dv	Non-inf	Non-inf	0.02	0.05	0	0	0	0	0						i1	i2	i12	i12
Dh	Dv	Non-inf	Non-inf	0.02	0.05	0	0	0	0	0						i1	i2	i12	i12
Dh	Dv	Non-inf	Non-inf	0.03	0.05	0	0	0	3	0						i1	i2	i12	i12
Dh	Dv	Non-inf	Non-inf	0.02	0.05	0	0	0	0	1						i1	i2	i12	i12
Dh	Dv	Non-inf	Non-inf	0.02	0.08	0	0	0	2	0						i1	i2	i12	i12
Dh	Dv	Non-inf	Non-inf	0.02	0.06	0	0	0	0	0						i1	i2	i12	i12
Dh	Dv	Non-inf	Non-inf	0.02	0.05	0	1	0	0	0						i1	i2	i12	i12
Dh	Dv	Non-inf	Non-inf	0.02	0.05	0	0	0	4	0						i1	i2	i12	i12
Dh	Dv	Non-inf	Non-inf	0.02	0.05	0	0	0	0	0						i1	i2	i12	i12
Dh	Dv	Non-inf	Non-inf	0.01	0.04	0.866667	0	0	0	0						i1	i2	i12	i12
Dh	Dv	Non-inf	Non-inf	0.02	0.05	0.0666667	0	0	3	0						i1	i2	i12	i12
Dh	Dv	Non-inf	Non-inf	0.04	0.06	0	0.533333	2	1	0						i1	i2	i12	i12
Dh	Dv	Non-inf	Non-inf	0.02	0.06	0	0	0	0	1						i1	i2	i12	i12
Dh	Dv	Non-inf	Non-inf	0.01	0.05	0	0	0	1	0						i1	i2	i12	i12
Dh	Dv	Non-inf	Non-inf	0.01	0.05	0.1	0	0	7	0						i1	i2	i12	i12
Dh	Dv	Non-inf	Non-inf	0.02	0.07	0	0.6	0	2	0						i1	i2	i12	i12
Dh	Dv	Non-inf	Non-inf	0.02	0.09	0	0.966667	0	1	0.0102389						i1	i2	i12	i12
Dh	Dv	Non-inf	Non-inf	0.02	0.05	0.933333	0	0	2	0.020979						i1	i2	i12	i12
Dh	Dv	Non-inf	Non-inf	0.03	0.08	0	0.0666667	0	0	0.807692						i1	i2	i12	i12
Dh	Dv	Non-inf	Non-inf	0.04	0.12	0	0	0	0	1						i1	i2	i12	i12
Dh	Dv	Non-inf	Non-inf	0.02	0.07	0	0.7	1	0	0						i1	i2	i12	i12
Dh	Dv	Non-inf	Non-inf	0.02	0.11	0	0	0	0	1						i1	i2	i12	i12
Dh	Dv	Non-inf	Non-inf	0.02	0.08	0	0.433333	0	0	0.281768						i1	i2	i12	i12
Dh	Dv	Non-inf	Non-inf	0.02	0.1	0.178218	0.533333	0	2	0.0273392						i1	i2	i12	i12
Dh	Dv	Non-inf	Non-inf	0.03	0.05	0	0.566667	0	1	0.0574163						i1	i2	i12	i12
Dh	Dv	Non-inf	Non-inf	0.04	0.05	1	0	0	0	0						i1	i2	i12	i12
Dh	Dv	Non-inf	Non-inf	0.04	0.06	0	1	0	0	0						i1	i2	i12	i12
Dh	Dv	Non-inf	Non-inf	0.02	0.09	0.0138889	0.6	0	5	0						i1	i2	i12	i12
Dh	Dv	Non-inf	Non-inf	0.01	0.04	0.0359281	0.366667	0	3	0						i1	i2	i12	i12
Dh	Dv	Non-inf	Non-inf	0.01	0.04	0	1	0	2	0						i1	i2	i12	i12
Dh	Dv	Non-inf	Non-inf	0.02	0.05	0.0430622	0.566667	0	2	0.0140899						i1	i2	i12	i12
Dh	Dv	Non-inf	Non-inf	0.03	0.04	0	1	0	1	0						i1	i2	i12	i12
Dh	Dv	Non-inf	Non-inf	0.02	0.04	0	0.7	0	3	0.0379747						i1	i2	i12	i12
Dh	Dv	Non-inf	Non-inf	0.05	0.07	1	0	1	3	0						i1	i2	i12	i12
Dh	Dv	Non-inf	Non-inf	0.04	0.06	1	0	0	6	0						i1	i2	i12	i12
Dh	Dv	Non-inf	Non-inf	0.02	0.04	0	1	0	0	0						i1	i2	i12	i12
Dh	Dv	Non-inf	Non-inf	0.02	0.03	0	0	1	0	0						i1	i2	i12	i12
Dh	Dv	Non-inf	Non-inf	0.04	0.05	0.133333	0	0	3	0.495763						i1	i2	i12	i12
Dh	Dv	Non-inf	Non-inf	0.01	0.02	0.5	0	1	0	0						i1	i2	i12	i12
Dh	Dv	Non-inf	Non-inf	0.04	0.1	0.0439883	0.383333	0	5	0.0340529						i1	i2	i12	i12
Dh	Dv	Non-inf	Non-inf	0.06	0.09	0.0762712	0.133333	0	7	0						i1	i2	i12	i12
Dh	Dv	Non-inf	Non-inf	0.05	0.08	0.9	0	0	0	0						i1	i2	i12	i12
Dh	Dv	Non-inf	Non-inf	0.03	0.05	0.0333333	0	1	5	0.742268						i1	i2	i12	i12
Dh	Dv	Non-inf	Non-inf	0.03	0.06	0	0.333333	1	3	0						i1	i2	i12	i12
Dh	Dv	Non-inf	Non-inf	0.02	0.04	0	1	0	0	0						i1	i2	i12	i12
Dh	Dv	Non-inf	Non-inf	0.02	0.03	0.634615	0.0666667	2	2	0						i1	i2	i12	i12
Dh	Dv	Non-inf	Non-inf	0.03	0.05	0	0.05	2	4	0						i1	i2	i12	i12
Dh	Dv	Non-inf	Non-inf	0.03	0.04	0.0508475	0.133333	2	9	0						i1	i2	i12	i12
Dh	Dv	Non-inf	Non-inf	0.03	0.05	0	0.916667	0	1	0						i1	i2	i12	i12
Dh	Dv	Non-inf	Non-inf	0.02	0.04	0.8	0	1	2	0						i1	i2	i12	i12
Dh	Dv	Non-inf	Non-inf	0.03	0.06	0	1	0	0	0						i1	i2	i12	i12
Dh	Dv	Non-inf	Non-inf	0.04	0.06	0.0927835	0.0333333	0	3	0.440281						i1	i2	i12	i12
Dh	Dv	Non-inf	Non-inf	0.05	0.07	0	0	0	0	0						i1	i2	i12	i12
Dh	Dv	Non-inf	Non-inf	0.03	0.08	0	0	0	0	0						i1	i2	i12	i12
Dh	Dv	Non-inf	Non-inf	0.06	0.09	0.388489	0.233333	0	6	0.0446546						i1	i2	i12	i12
Dh	Dv	Non-inf	Non-inf	0.05	0.1	0	0	0	3	0						i1	i2	i12	i12
Dh	Dv	Non-inf	Non-inf	0.05	0.07	0	1	0	0	0						i1	i2	i12	i12
Dh	Dv	Non-inf	Non-inf	0.04	0.06	0	0	2	4	0						i1	i2	i12	i12
Dh	Dv	Non-inf	Non-inf	0.06	0.08	0	0.0333333	1	5	0						i1	i2	i12	i12
Dh	Dv	Non-inf	Non-inf	0.04	0.06	0.138889	0.6	1	4	0.00658858						i1	i2	i12	i12
Dh	Dv	Non-inf	Non-inf	0.02	0.05	0.0406977	0.8	0	2	0						i1	i2	i12	i12
Dh	Dv	Non-inf	Non-inf	0.02	0.05	0.0410959	0.266667	1	3	0.374191						i1	i2	i12	i12
Dh	Dv	Non-inf	Non-inf	0.02	0.05	0	0.0333333	0	1	0						i1	i2	i12	i12
Dh	Dv	Non-inf	Non-inf	0.03	0.05	0	0.3	0	2	0						i1	i2	i12	i12
Dh	Dv	Non-inf	Non-inf	0.02	0.04	0	1	0	0	0						i1	i2	i12	i12
Dh	Dv	Non-inf	Non-inf	0.03	0.05	0.0463918	0.0333333	0	1	0.775248						i1	i2	i12	i12
Dh	Dv	Non-inf	Non-inf	0.03	0.04	0	1	0	0	0						i1	i2	i12	i12
Dh	Dv	Non-inf	Non-inf	0.01	0.03	0.0371287	0.533333	0	6	0.0291774						i1	i2	i12	i12
Dh	Dv	Non-inf	Non-inf	0.03	0.04	0.113924	0.7	0	2	0						i1	i2	i12	i12
Dh	Dv	Non-inf	Non-inf	0.07	0.04	0.631231	0.000999001	10	0	0						i1	i2	i12	i12
Dh	Dv	Non-inf	Non-inf	0.05	0.02	0	0	0	0	0						i1	i2	i12	i12
Dh	Dv	Non-inf	Non-inf	0.05	0.03	0.371134	0.0333333	0	0	0.139259						i1	i2	i12	i12
Dh	Dv	Non-inf	Non-inf	0.05	0.02	0	0	0	0	0						i1	i2	i12	i12
Dh	Dv	Non-inf	Non-inf	0.05	0.02	0	0	0	0	0						i1	i2	i12	i12
Dh	Dv	Non-inf	Non-inf	0.05	0.02	0	0	0	0	0						i1	i2	i12	i12
Dh	Dv	Non-inf	Non-inf	0.09	0.04	0.381356	0.133333	1	1	0						i1	i2	i12	i12
Dh	Dv	Non-inf	Non-inf	0.08	0.06	0	0	1	0	0						i1	i2	i12	i12
Dh	Dv	Non-inf	Non-inf	0.03	0.01	0	0	0	4	0						i1	i2	i12	i12
Dh	Dv	Non-inf	Non-inf	0.14	0.09	0	0	0	0	1						i1	i2	i12	i12
Dh	Dv	Non-inf	Non-inf	0.08	0.06	0.666667	0	1	1	0.130435						i1	i2	i12	i12
Dh	Dv	Non-inf	Non-inf	0.09	0.06	0.9	0	0	1	0.0322581						i1	i2	i12	i12
Dh	Dv	Non-inf	Non-inf	0.05	0.04	0	0.966667	0	0	0.0102389						i1	i2	i12	i12
Dh	Dv	Non-inf	Non-inf	0.04	0.03	0	0	1	0	0						i1	i2	i12	i12
Dh	Dv	Non-inf	Non-inf	0.07	0.05	0	0.933333	0	0	0						i1	i2	i12	i12
Dh	Dv	Non-inf	Non-inf	0.14	0.09	0	0	0	4	0						i1	i2	i12	i12
Dh	Dv	Non-inf	Non-inf	0.06	0.05	0.0666667	0	0	1	0.807692						i1	i2	i12	i12
Dh	Dv	Non-inf	Non-inf	0.05	0.02	0	1	0	1	0						i1	i2	i12	i12
Dh	Dv	Non-inf	Non-inf	0.06	0.02	0	0.0333333	8	1	0						i1	i2	i12	i12
Dh	Dv	Non-inf	Non-inf	0.04	0.02	0.680412	0.0333333	1	0	0.0127592						i1	i2	i12	i12
Dh	Dv	Non-inf	Non-inf	0.05	0.04	0	0	0	1	0						i1	i2	i12	i12
Dh	Dv	Non-inf	Non-inf	0.05	0.02	0	0.0666667	5	1	0						i1	i2	i12	i12
Dh	Dv	Non-inf	Non-inf	0.04	0.03	0	0	5	2	0						i1	i2	i12	i12
Dh	Dv	Non-inf	Non-inf	0.08	0.06	0	0.9	0	2	0.0322581						i1	i2	i12	i12
Dh	Dv	Non-inf	Non-inf	0.05	0.04	0	0	0	0	0						i1	i2	i12	i12
Dh	Dv	Non-inf	Non-inf	0.05	0.03	0	0.0666667	1	1	0.490385						i1	i2	i12	i12
Dh	Dv	Non-inf	Non-inf	0.05	0.02	0	0	8	2	0						i1	i2	i12	i12
Dh	Dv	Non-inf	Non-inf	0.05	0.02	0.663462	0.0666667	6	2	0.064092						i1	i2	i12	i12
Dh	Dv	Non-inf	Non-inf	0.05	0.02	0.1	0	4	1	0						i1	i2	i12	i12
Dh	Dv	Non-inf	Non-inf	0.06	0.04	0	0	0	0	1						i1	i2	i12	i12
Dh	Dv	Non-inf	Non-inf	0.04	0.03	0.336898	0.0166667	6	3	0						i1	i2	i12	i12
Dh	Dv	Non-inf	Non-inf	0.04	0.02	0	0	6	1	0						i1	i2	i12	i12
Dh	Dv	Non-inf	Non-inf	0.05	0.03	0.545455	0	7	3	0.172549						i1	i2	i12	i12
Dh	Dv	Non-inf	Non-inf	0.1	0.03	0	0.3125	0	0	0.375587						i1	i2	i12	i12
Dh	Dv	Non-inf	Non-inf	0.04	0.02	0	0.233333	0	1	0						i1	i2	i12	i12
Dh	Dv	Non-inf	Non-inf	0.05	0.02	0	0.0666667	1	0	0.807692						i1	i2	i12	i12
Dh	Dv	Non-inf	Non-inf	0.09	0.05	1	0	0	0	0						i1	i2	i12	i12
Dh	Dv	Non-inf	Non-inf	0.06	0.05	0	1	0	0	0						i1	i2	i12	i12
Dh	Dv	Non-inf	Non-inf	0.03	0.03	0.416667	0	2	1	0						i1	i2	i12	i12
Dh	Dv	Non-inf	Non-inf	0.02	0.02	0	0.433333	1	4	0.281768						i1	i2	i12	i12
Dh	Dv	Non-inf	Non-inf	0.07	0.07	0	0.966667	0	1	0						i1	i2	i12	i12
Dh	Dv	Non-inf	Non-inf	0.03	0.03	0	0.4	0	0	0.310345						i1	i2	i12	i12
Dh	Dv	Non-inf	Non-inf	0.06	0.06	0	0	0	0	0						i1	i2	i12	i12
Dh	Dv	Non-inf	Non-inf	0.06	0.06	0	0	0	0	1						i1	i2	i12	i12
Dh	Dv	Non-inf	Non-inf	0.07	0.07	0.20339	0	0	2	0.536053						i1	i2	i12	i12
Dh	Dv	Non-inf	Non-inf	0.05	0.05	0	0	0	0	1						i1	i2	i12	i12
Dh	Dv	Non-inf	Non-inf	0.06	0.06	0.966667	0	0	0	0						i1	i2	i12	i12
Dh	Dv	Non-inf	Non-inf	0.04	0.04	0.403846	0.0666667	1	1	0.131037						i1	i2	i12	i12
Dh	Dv	Non-inf	Non-inf	0.04	0.04	0.0666667	0	0	0	0.807692						i1	i2	i12	i12
Dh	Dv	Non-inf	Non-inf	0.05	0.05	0	0.0166667	0	0	0.946524						i1	i2	i12	i12
Dh	Dv	Non-inf	Non-inf	0.04	0.09	1	0	0	1	0						i1	i2	i12	i12
Dh	Dv	Non-inf	Non-inf	0.06	0.06	0	0	1	8	0						i1	i2	i12	i12
Dh	Dv	Non-inf	Non-inf	0.04	0.04	0.733333	0	0	3	0.0983607						i1	i2	i12	i12
Dh	Dv	Non-inf	Non-inf	0.04	0.04	0.802139	0.0166667	2	4	0						i1	i2	i12	i12
Dh	Dv	Non-inf	Non-inf	0.05	0.05	1	0	0	3	0						i1	i2	i12	i12
Dh	Dv	Non-inf	Non-inf	0.05	0.05	0.533333	0	1	4	0						i1	i2	i12	i12
Dh	Dv	Non-inf	Non-inf	0.03	0.03	0	0	0	0	0						i1	i2	i12	i12
Dh	Dv	Non-inf	Non-inf	0.07	0.07	0	0.166667	0	1	0						i1	i2	i12	i12
Dh	Dv	Non-inf	Non-inf	0.05	0.05	0.00621784	0.724138	1	4	0.0434591						i1	i2	i12	i12
Dh	Dv	Non-inf	Non-inf	0.06	0.06	0.115385	0.0666667	1	2	0.544957						i1	i2	i12	i12
Dh	Dv	Non-inf	Non-inf	0.06	0.06	0	0.1	1	0	0.72973						i1	i2	i12	i12
Dh	Dv	Non-inf	Non-inf	0.04	0.04	0	0	0	0	0						i1	i2	i12	i12
Dh	Dv	Non-inf	Non-inf	0.06	0.06	0.9	0	0	3	0						i1	i2	i12	i12
Dh	Dv	Non-inf	Non-inf	0.04	0.04	0	0.1	1	0	0.72973						i1	i2	i12	i12
Dh	Dv	Non-inf	Non-inf	0.03	0.03	0.9	0	0	0	0						i1	i2	i12	i12
Dh	Dv	Non-inf	Non-inf	0.05	0.09	0.833333	0	0	0	0						i1	i2	i12	i12
Dh	Dv	Non-inf	Non-inf	0.04	0.04	0	1	0	2	0						i1	i2	i12	i12
Dh	Dv	Non-inf	Non-inf	0.04	0.04	0.594595	0.1	1	2	0						i1	i2	i12	i12
Dh	Dv	Non-inf	Non-inf	0.03	0.03	0.564443	0.0338983	3	3	0.0213268						i1	i2	i12	i12
Dh	Dv	Non-inf	Non-inf	0.03	0.03	0.37123	0.135593	1	4	0.0648484						i1	i2	i12	i12
Dh	Dv	Non-inf	Non-inf	0.05	0.05	0	0.916667	0	2	0						i1	i2	i12	i12
Dh	Dv	Non-inf	Non-inf	0.04	0.04	0	0.833333	1	2	0						i1	i2	i12	i12
Dh	Dv	Non-inf	Non-inf	0.03	0.03	1	0	0	2	0						i1	i2	i12	i12
Dh	Dv	Non-inf	Non-inf	0.05	0.05	0	0.833333	0	2	0.0566038						i1	i2	i12	i12
Dh	Dv	Non-inf	Non-inf	0.05	0.05	0	0	0	0	1						i1	i2	i12	i12
Dh	Dv	Non-inf	Non-inf	0.07	0.07	0.31692	0.118644	3	3	0.0347485						i1	i2	i12	i12
Dh	Dv	Non-inf	Non-inf	0.08	0.08	0.309278	0.0333333	1	6	0.0563262						i1	i2	i12	i12
Dh	Dv	Non-inf	Non-inf	0.05	0.05	0.127119	0.133333	0	1	0.446379						i1	i2	i12	i12
Dh	Dv	Non-inf	Non-inf	0.05	0.05	0	0.866667	2	4	0.0441176						i1	i2	i12	i12
Dh	Dv	Non-inf	Non-inf	0.04	0.04	0.0833333	0	0	1	0.767442						i1	i2	i12	i12
Dh	Dv	Non-inf	Non-inf	0.05	0.05	0.402062	0.0333333	0	2	0						i1	i2	i12	i12
Dh	Dv	Non-inf	Non-inf	0.04	0.04	0	1	0	1	0						i1	i2	i12	i12
Dh	Dv	Non-inf	Non-inf	0.03	0.03	0	0.566667	0	1	0						i1	i2	i12	i12
Dh	Dv	Non-inf	Non-inf	0.04	0.04	0	0.0666667	0	1	0						i1	i2	i12	i12
Dh	Dv	Non-inf	Non-inf	0.04	0.04	0.0808383	0.366667	2	6	0.00843875						i1	i2	i12	i12
Dh	Dv	Non-inf	Non-inf	0.05	0.05	0	0	0	0	0						i1	i2	i12	i12
Dh	Dv	Non-inf	Non-inf	0.06	0.06	0	0	0	1	0						i1	i2	i12	i12
Dh	Dv	Non-inf	Non-inf	0.04	0.04	0	0.0333333	0	3	0						i1	i2	i12	i12
Dh	Dv	Non-inf	Non-inf	0.05	0.05	0	1	0	0	0						i1	i2	i12	i12
Dh	Dv	Non-inf	Non-inf	0.04	0.04	0.00505902	0.983333	0	1	0						i1	i2	i12	i12
Dh	Dv	Non-inf	Non-inf	0.04	0.04	0	0	0	0	1						i1	i2	i12	i12
Dh	Dv	Non-inf	Non-inf	0.05	0.05	0.983333	0	0	2	0						i1	i2	i12	i12
Dh	Dv	Non-inf	Non-inf	0.04	0.04	0	0.847458	1	1	0.011205						i1	i2	i12	i12
Dh	Dv	Non-inf	Non-inf	0.05	0.05	0	0.966667	0	1	0.0102389						i1	i2	i12	i12
Dh	Dv	Non-inf	Non-inf	0.03	0.03	0.0836653	0.766667	0	2	0						i1	i2	i12	i12
Dh	Dv	Non-inf	Non-inf	0.05	0.05	1	0	0	0	0						i1	i2	i12	i12
Dh	Dv	Non-inf	Non-inf	0.05	0.05	0	0.983333	0	0	0						i1	i2	i12	i12
Dh	Dv	Inf	Non-inf	0.02	0.06	0	0.933333	0	2	0						i1		i12	i12
Dh	Dv	Inf	Non-inf	0.03	0.05	0	0	0	0	0						i1		i12	i12
Dh	Dv	Inf	Non-inf	0.04	0.06	0.115385	0.0666667	1	1	0.0473876						i1		i12	i12
Dh	Dv	Inf	Non-inf	0.03	0.08	0	0	0	7	0						i1		i12	i12
Dh	Dv	Inf	Non-inf	0.08	0.02	0	0	0	0	0						i1		i12	i12
Dh	Dv	Inf	Non-inf	0.05	0.03	0	0	0	3	0						i1		i12	i12
Dh	Dv	Inf	Non-inf	0.1	0.04	1	0	0	0	0						i1		i12	i12
Dh	Dv	Inf	Non-inf	0.05	0.02	1	0	0	0	0						i1		i12	i12
Dh	Dv	Inf	Non-inf	0.05	0.03	0	0	2	0	0						i1		i12	i12
Dh	Dv	Inf	Non-inf	0.1	0.04	0.3	0	0	1	0.411765						i1		i12	i12
Dh	Dv	Inf	Non-inf	0.1	0.06	0	0	0	1	0						i1		i12	i12
Dh	Dv	Inf	Non-inf	0.09	0.04	0.4	0	0	0	0.310345						i1		i12	i12
Dh	Dv	Inf	Non-inf	0.06	0.04	0.4	0	0	0	0						i1		i12	i12
Dh	Dv	Inf	Non-inf	0.06	0.05	0	0	2	0	0						i1		i12	i12
Dh	Dv	Inf	Non-inf	0.08	0.05	0	0	0	0	1						i1		i12	i12
Dh	Dv	Inf	Non-inf	0.06	0.04	0	0.366667	3	0	0						i1		i12	i12
Dh	Dv	Inf	Non-inf	0.09	0.04	0	0	0	0	1						i1		i12	i12
Dh	Dv	Inf	Non-inf	0.05	0.02	0.966667	0	2	1	0.0102389						i1		i12	i12
Dh	Dv	Inf	Non-inf	0.04	0.02	0.933333	0	0	4	0.0157343						i1		i12	i12
Dh	Dv	Inf	Non-inf	0.05	0.03	0	0.816667	2	0	0.0458891						i1		i12	i12
Dh	Dv	Inf	Non-inf	0.05	0.03	0	0.166667	0	4	0						i1		i12	i12
Dh	Dv	Inf	Non-inf	0.06	0.04	0	0	3	3	0						i1		i12	i12
Dh	Dv	Inf	Non-inf	0.05	0.02	0	0.35	0	1	0.0458716						i1		i12	i12
Dh	Dv	Inf	Non-inf	0.06	0.03	0	0.7	0	0	0						i1		i12	i12
Dh	Dv	Inf	Non-inf	0.06	0.06	0	0.233333	1	0	0.399281						i1		i12	i12
Dh	Dv	Inf	Non-inf	0.03	0.03	0.00917431	0.35	0	2	0						i1		i12	i12
Dh	Dv	Inf	Non-inf	0.06	0.06	0	1	0	3	0						i1		i12	i12
Dh	Dv	Non-inf	Inf	0.05	0.06	0.661017	0.133333	1	0	0							i2	i12	i12
Dh	Dv	Non-inf	Inf	0.04	0.01	0.151079	0.233333	0	0	0.293895							i2	i12	i12
Dh	Dv	Non-inf	Inf	0.02	0.04	0.783333	0	2	0	0							i2	i12	i12
Dh	Dv	Non-inf	Inf	0.03	0.04	0.431818	0.2	3	0	0.0733333							i2	i12	i12
Dh	Dv	Non-inf	Inf	0.03	0.07	0.680412	0.0333333	0	1	0							i2	i12	i12
Dh	Dv	Non-inf	Inf	0.02	0.06	0	0	0	4	0							i2	i12	i12
Dh	Dv	Non-inf	Inf	0.03	0.06	0	0.983333	4	0	0.00505902							i2	i12	i12
Dh	Dv	Non-inf	Inf	0.04	0.06	0.603093	0.0333333	0	1	0							i2	i12	i12
Dh	Dv	Non-inf	Inf	0.02	0.05	0	0.333333	0	0	0.0375							i2	i12	i12
Dh	Dv	Non-inf	Inf	0.02	0.03	0.966667	0	0	2	0.0102389							i2	i12	i12
Dh	Dv	Non-inf	Inf	0.1	0.07	0	0	0	0	1							i2	i12	i12
Dh	Dv	Non-inf	Inf	0.05	0.03	0	0.233333	0	1	0							i2	i12	i12
Dh	Dv	Non-inf	Inf	0.05	0.02	0	0	1	4	0							i2	i12	i12
Dh	Dv	Non-inf	Inf	0.05	0.04	0	0	0	0	0							i2	i12	i12
Dh	Dv	Non-inf	Inf	0.06	0.06	0.533333	0	0	1	0.118812							i2	i12	i12
Dh	Dv	Non-inf	Inf	0.07	0.07	0.0666667	0	2	0	0.663462							i2	i12	i12
Dh	Dv	Inf	Inf	0.03	0.05	0.833333	0	3	3	0								i12	i12
Dh	Dv	Inf	Inf	0.05	0.08	0	0	0	0	0								i12	i12
Dh	Dv	Inf	Inf	0.04	0.07	0	0	0	0	0								i12	i12
Dh	Dv	Inf	Inf	0.05	0.07	0.983333	0	0	0	0.00505902								i12	i12
Dh	Dv	Inf	Inf	0.04	0.06	0.533333	0	1	3	0.178218								i12	i12
Dh	Dv	Inf	Inf	0.03	0.05	0.65	0	0	0	0								i12	i12
Dh	Dv	Inf	Inf	0.02	0.06	0	0	3	0	0								i12	i12
Dh	Dv	Inf	Inf	0.02	0.05	0	0	0	0	1								i12	i12
Dh	Dv	Inf	Inf	0.05	0.11	1	0	0	2	0								i12	i12
Dh	Dv	Inf	Inf	0.05	0.03	1	0	3	0	0								i12	i12
Dh	Dv	Inf	Inf	0.1	0.04	0.540541	0.1	0	0	0.0985165								i12	i12
Dh	Dv	Inf	Inf	0.16	0.09	0	0	0	1	0								i12	i12
Dh	Dv	Inf	Inf	0.04	0.02	0	0	0	0	0								i12	i12
Dh	Dv	Inf	Inf	0.06	0.02	0	0	2	5	0								i12	i12
Dh	Dv	Inf	Inf	0.04	0.02	0	0.266667	0	0	0								i12	i12
Dh	Dv	Inf	Inf	0.04	0.03	0	0	1	4	0								i12	i12
Dh	Dv	Inf	Inf	0.04	0.03	0	1	0	0	0								i12	i12
Dh	Dv	Inf	Inf	0.04	0.02	0.0833333	0	0	1	0.767442								i12	i12
Dh	Dv	Inf	Inf	0.04	0.02	0	0	0	0	1								i12	i12
Dh	Dv	Inf	Inf	0.07	0.05	0.533333	0	1	3	0.178218								i12	i12
Dh	Dv	Inf	Inf	0.1	0.08	0	0	3	0	0								i12	i12
Dh	Dv	Inf	Inf	0.08	0.07	1	0	0	2	0								i12	i12
Dh	Dv	Inf	Inf	0.07	0.04	1	0	0	0	0								i12	i12
Dh	Dv	Inf	Inf	0.07	0.04	0.834225	0.0166667	1	0	0.00564403								i12	i12
Dh	Dv	Inf	Inf	0.05	0.05	0	0	0	0	1								i12	i12
Dh	Dv	Inf	Inf	0.02	0.02	0.334532	0.233333	1	2	0.116665								i12	i12
Dh	Dv	Inf	Inf	0.04	0.04	0.9	0	0	1	0.016129								i12	i12
Dh	Dv	Inf	Inf	0.07	0.07	0	0.4	1	3	0								i12	i12
Dh	Dv	Inf	Inf	0.04	0.04	0.0135135	0.1	1	3	0								i12	i12
Dh	Dv	Inf	Inf	0.04	0.04	0.0614754	0.733333	0	2	0.00606201								i12	i12
Dh	Dv	Inf	Inf	0.05	0.05	0.366667	0	0	1	0.242515								i12	i12
Dh	Dv	Inf	Inf	0.02	0.02	0.833333	0	1	0	0.0339623								i12	i12
Dh	Dv	Inf	Inf	0.03	0.03	1	0	0	0	0								i12	i12
Dh	Dv	Inf	Inf	0.03	0.03	0.0166667	0	0	0	0.625668								i12	i12
Dh	Dv	Inf	Inf	0.03	0.03	0	0	0	0	0								i12	i12
Dh	Dv	Inf	Inf	0.03	0.03	0.316667	0	0	1	0.392971								i12	i12

## Sheet: Legend
Amphipods
	Dh	Dikerogammarus haemobaphes
	Dv	Dikerogammarus villosus
Infection
	Non-inf	non-infected
	Inf	infected with Cucumispora dikerogammari
Variables
	Mass	wet biomasses of amphipods (g)
	Time in shelter	time spent by amphipods in the shelter (fraction of the total experimental time)
	Aggression	number of aggression acts performed by amphipods
	Together in shelter	time spent by both amphipods together in the shelter (fraction of the total experimental time)
Analyses
	Numers 1-4 and letters A-D refer to descriptions in Supplementary file1, Table S2
	Letters indicate pairs and individuals included in the datasets for particular analyses
	r	individuals randomly selected from uniform pairs (selected using the rnd() function, then turned into fixed values to indicate which particular individuals were randomly selected for our analyses)
	i1, i2	individual 1 or 2 included in the analysis, respectively
	i12	both individuals from the pair analysed
